# Supplementary material for: Effect of body mass index on mortality for diabetic patients with aortic stenosis
Source: publisher site journal article supplement (doi:10.18632/aging.206018), 2024-07-24
Supplement: Supplementary file [file aging-v16-206018-supplementary-material-SD1.pdf]

## SUPPLEMENTARY FIGURE

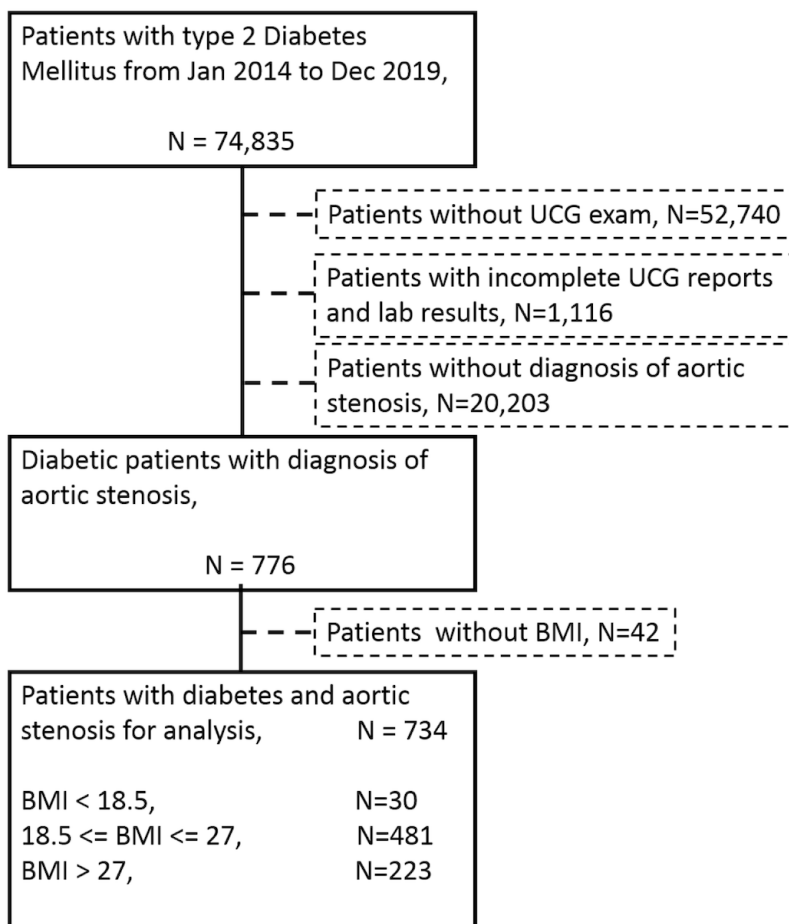

**Supplementary Figure 1. Flow chart of patient selection.** BMI, body mass index; UCG, ultrasound cardiogram.
