# Supplementary material for: Effect of body mass index on mortality for diabetic patients with aortic stenosis
Source: publisher site journal article supplement (doi:10.18632/aging.206018), 2024-07-24
Supplement: Supplementary file [file aging-v16-206018-supplementary-material-SD2.pdf]

## SUPPLEMENTARY TABLES

**Supplementary Table 1. Baseline medications according to BMI.**

|                     | <b>BMI &lt; 18.5 (N=30)</b> | <b>18.5 ≤ BMI ≤ 27 (N=481)</b> | <b>BMI ≥ 27 (N=223)</b> | <b>P-value</b> |
|---------------------|-----------------------------|--------------------------------|-------------------------|----------------|
| CCB                 | 18 (60.0)                   | 284 (59.0)                     | 156 (70.0)              | 0.020          |
| BB                  | 16 (53.3)                   | 239 (49.7)                     | 117 (52.5)              | 0.756          |
| ACEi/ ARB           | 13 (43.3)                   | 260 (54.1)                     | 143 (64.1)              | 0.014          |
| Diuretics           | 20 (66.7)                   | 281 (58.4)                     | 135 (60.5)              | 0.616          |
| Statin              | 14 (46.7)                   | 230 (47.8)                     | 126 (56.5)              | 0.092          |
| Insulin             | 12 (40.0)                   | 203 (42.2)                     | 102 (45.7)              | 0.636          |
| Metformin           | 12 (40.0)                   | 177 (36.8)                     | 107 (48.0)              | 0.019          |
| SGLT2i              | 0 (0.0)                     | 24 (5.0)                       | 20 (9.0)                | 0.043          |
| DPP4i               | 10 (33.3)                   | 216 (44.9)                     | 118 (52.9)              | 0.045          |
| Sulfonylurea        | 10 (33.3)                   | 173 (36.0)                     | 84 (37.7)               | 0.854          |
| GLP1 agonist        | 0 (0.0)                     | 1 (0.0)                        | 4 (1.8)                 | 0.053          |
| Anti-coagulant      | 7 (23.3)                    | 87 (18.1)                      | 50 (22.4)               | 0.352          |
| Antiplatelet agents | 12 (40.0)                   | 287 (59.7)                     | 130 (58.3)              | 0.105          |

Data are expressed as number (percentage). ACEi, angiotensin converting enzyme inhibitor; ARB, angiotensin receptor blocker; BB, beta-blockers; CCB, calcium channel blocker; DPP4i, dipeptidyl peptidase IV inhibitor; GLP1 agonist, glucagon-like peptide 1 agonist; SGLT2i, sodium-glucose co-transporter 2 inhibitor.

**Supplementary Table 2. Univariable cox regression analysis model for mortalities.**

|                           | <b>All-cause mortality</b> |                | <b>Cardiovascular death</b> |                | <b>Non-cardiovascular death</b> |                |
|---------------------------|----------------------------|----------------|-----------------------------|----------------|---------------------------------|----------------|
|                           | <b>HR (95% CI)</b>         | <b>P-value</b> | <b>HR (95% CI)</b>          | <b>P-value</b> | <b>HR (95% CI)</b>              | <b>P-value</b> |
| BMI group                 |                            |                |                             |                |                                 |                |
| 18.5 ≤ BMI ≤ 27           | Reference                  |                | Reference                   |                | Reference                       |                |
| BMI < 18.5                | 2.11 (1.32-3.37)           | 0.002          | 1.24 (0.45-3.39)            | 0.678          | 2.59 (1.52-4.42)                | < 0.001        |
| BMI > 27                  | 0.62 (0.47-0.83)           | 0.001          | 0.46 (0.27-0.79)            | 0.005          | 0.71 (0.51-1.00)                | 0.048          |
| Male vs. female           | 1.04 (0.83-1.32)           | 0.729          | 1.10 (0.73-1.66)            | 0.635          | 1.01 (0.76-1.35)                | 0.923          |
| Age ≥ 80 vs. < 80         | 2.04 (1.71-2.59)           | < 0.001        | 1.64 (1.09-2.48)            | 0.018          | 2.28 (1.70-3.06)                | < 0.001        |
| AS severity               |                            |                |                             |                |                                 |                |
| severe vs. mild/moderate  | 0.91 (0.70-1.19)           | 0.483          | 1.48 (0.96-2.26)            | 0.073          | 0.69 (0.48-0.98)                | 0.036          |
| Hypertension (yes vs. no) | 1.26 (0.99-1.60)           | 0.063          | 1.51 (0.98-2.33)            | 0.061          | 1.15 (0.86-1.54)                | 0.338          |
| ESRD (yes vs. no)         | 0.70 (0.39-1.25)           | 0.227          | 0.35 (0.09-1.41)            | 0.139          | 0.88 (0.46-1.66)                | 0.689          |
| CAD (yes vs. no)          | 1.01 (0.79-1.29)           | 0.933          | 1.46 (0.97-2.21)            | 0.073          | 0.83 (0.61-1.14)                | 0.249          |

AS, aortic stenosis; BMI, body mass index; CAD, coronary artery disease; CI, confidence interval; ESRD, end stage renal disease; HR, hazard ratio.

**Supplementary Table 3. Subgroup analysis with multivariable cox regression model.**

| <b>BMI &lt; 18.5 vs. 18.5 ≤ BMI ≤ 27</b> |                            |                |                             |                |                                 |                |
|------------------------------------------|----------------------------|----------------|-----------------------------|----------------|---------------------------------|----------------|
| <b>Subgroup</b>                          | <b>All-cause mortality</b> |                | <b>Cardiovascular death</b> |                | <b>Non-cardiovascular death</b> |                |
|                                          | <b>HR (95% CI)</b>         | <b>P-value</b> | <b>HR (95% CI)</b>          | <b>P-value</b> | <b>HR (95% CI)</b>              | <b>P-value</b> |
| Sex                                      | P for interaction          | 0.726          |                             | 0.696          |                                 | 0.864          |
| Male (N=227)                             | 2.05 (0.87-4.82)           | 0.102          | 0.87 (0.12-6.63)            | 0.896          | 2.84 (1.09-7.41)                | 0.033          |
| Female (N=284)                           | 2.22 (1.23-3.99)           | 0.008          | 1.36 (0.41-4.50)            | 0.609          | 2.62 (1.33-5.17)                | 0.005          |
| Age                                      | P for interaction          | 0.448          |                             | 0.504          |                                 | 0.721          |
| < 80 years (N=237)                       | 1.64 (0.65-4.15)           | 0.295          | 0.63 (0.08-4.74)            | 0.655          | 2.59 (0.89-7.48)                | 0.079          |
| ≥ 80 years (N=274)                       | 2.33 (1.33-4.07)           | 0.005          | 1.48 (0.46-4.83)            | 0.513          | 2.75 (1.45-5.20)                | 0.002          |
| Hypertension                             | P for interaction          | 0.538          |                             | 0.322          |                                 | 0.998          |
| Yes (N=297)                              | 1.71 (0.92-3.21)           | 0.092          | 0.68 (0.16-2.83)            | 0.593          | 2.50 (1.23-5.08)                | 0.011          |
| No (N=214)                               | 2.82 (1.30-6.13)           | 0.009          | 2.05 (0.45-9.36)            | 0.356          | 3.29 (1.33-8.16)                | 0.010          |
| ESRD                                     | P for interaction          | -              |                             | -              |                                 | -              |
| Yes (N=34)                               | -                          | -              | -                           | -              | -                               | -              |
| No (N=477)                               | 1.96 (1.22-3.14)           | 0.006          | 1.07 (0.39-2.96)            | 0.890          | 2.47 (1.44-4.24)                | 0.001          |
| AS severity                              | P for interaction          | 0.151          |                             | 0.484          |                                 | 0.281          |
| Mild/moderate (N=371)                    | 2.14 (1.42-4.05)           | 0.001          | 1.39 (0.43-4.50)            | 0.583          | 2.88 (1.60-5.18)                | <0.001         |
| Severe (=140)                            | 0.89 (0.28-2.93)           | 0.858          | 0.52 (0.07-3.89)            | 0.522          | 1.36 (0.31-5.89)                | 0.682          |
| <b>BMI &gt; 27 vs. 18.5 ≤ BMI ≤ 27</b>   |                            |                |                             |                |                                 |                |
| <b>Subgroup</b>                          | <b>All-cause mortality</b> |                | <b>Cardiovascular death</b> |                | <b>Non-cardiovascular death</b> |                |
|                                          | <b>HR (95% CI)</b>         | <b>P-value</b> | <b>HR (95% CI)</b>          | <b>P-value</b> | <b>HR (95% CI)</b>              | <b>P-value</b> |
| Sex                                      | P for interaction          | 0.721          |                             | 0.911          |                                 | 0.660          |
| Male (N=318)                             | 0.81 (0.65-1.01)           | 0.063          | 0.69 (0.47-1.03)            | 0.067          | 0.88 (0.68-1.15)                | 0.360          |
| Female (N=386)                           | 0.75 (0.62-0.91)           | 0.004          | 0.61 (0.42-0.90)            | 0.013          | 0.82 (0.65-1.03)                | 0.087          |
| Age                                      | P for interaction          | 0.387          |                             | 0.530          |                                 | 0.628          |
| < 80 years(N=360)                        | 0.73 (0.59-0.91)           | 0.005          | 0.59 (0.40-0.87)            | 0.008          | 0.82 (0.63-1.07)                | 0.143          |
| ≥ 80 years (N=344)                       | 0.84 (0.69-1.01)           | 0.070          | 0.74 (0.50-1.08)            | 0.120          | 0.87 (0.70-1.10)                | 0.245          |
| Hypertension                             | P for interaction          | 0.222          |                             | 0.794          |                                 | 0.164          |
| Yes (N=434)                              | 0.74 (0.62-0.89)           | 0.001          | 0.66 (0.49-0.90)            | 0.009          | 0.79 (0.63-0.98)                | 0.033          |
| No (N=270)                               | 0.89 (0.70-1.14)           | 0.367          | 0.59 (0.32-1.08)            | 0.085          | 1.01 (0.76-1.33)                | 0.946          |
| ESRD                                     | P for interaction          | 0.298          |                             | -              |                                 | 0.342          |
| Yes (N=47)                               | 0.52 (0.18-1.48)           | 0.219          | -                           | -              | 0.55 (0.19-1.60)                | 0.273          |
| No (N=657)                               | 0.80 (0.69-0.93)           | 0.003          | 0.66 (0.50-0.87)            | 0.003          | 0.87 (0.73-1.04)                | 0.120          |
| AS severity                              | P for interaction          | 0.935          |                             | 0.453          |                                 | 0.623          |
| Mild/moderate (N=528)                    | 0.78 (0.67-0.92)           | 0.004          | 0.60 (0.42-0.84)            | 0.003          | 0.86 (0.72-1.04)                | 0.133          |
| Severe (N=176)                           | 0.74 (0.54-1.02)           | 0.064          | 0.71 (0.45-1.13)            | 0.146          | 0.77 (0.49-1.20)                | 0.248          |

The hazard ratio was adjusted for outcome-associated factors including age, sex, hypertension, ESRD, severity of AS. AS, aortic stenosis; BMI, body mass index; CAD, coronary artery disease; CI, confidence interval; ESRD, end stage renal disease; HR, hazard ratio.
